# Supplementary material for: Histopathologic Response Is a Positive Predictor of Overall Survival in Patients Undergoing Neoadjuvant/Perioperative Chemotherapy for Locally Advanced Gastric or Gastroesophageal Junction Cancers—Analysis from a Large Single Center Cohort in Germany
Source: MDPI journal article supplement (doi:10.3390/cancers12082244), 2020-08-11

# Supplementary Material: Histopathologic Response is A Positive Predictor of Overall Survival in Patients Undergoing Neoadjuvant/Perioperative Chemotherapy for Locally Advanced Gastric or Gastroesophageal Junction Cancers—Analysis from A Large Single Center Cohort in Germany

Rebekka Schirren, Alexander Novotny, Helmut Friess and Daniel Reim

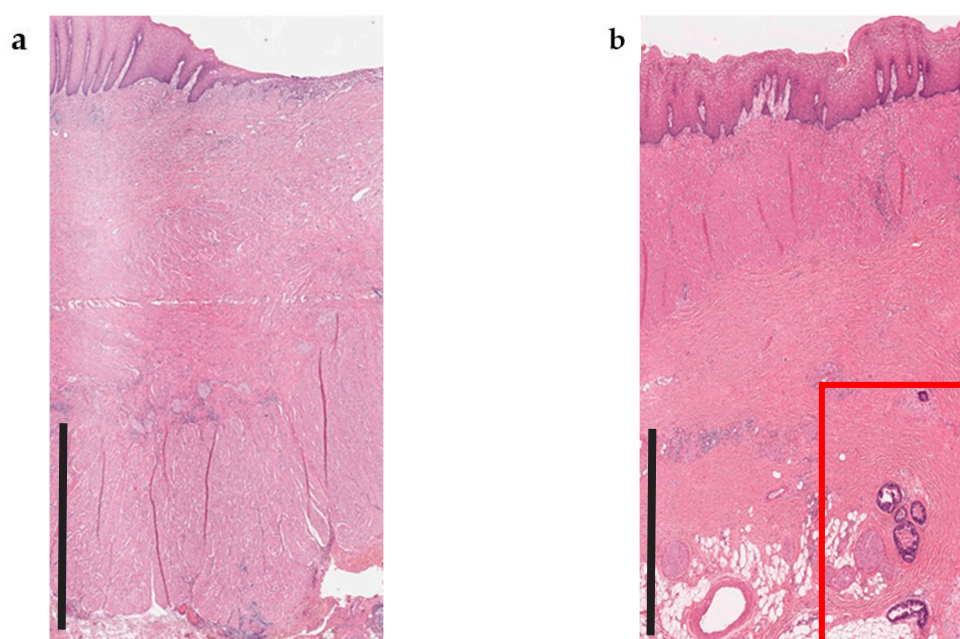

**Figure S1.** Histopathologic response grade Becker 1a and Becker 1b ((Sub-)total response (0–10% residual tumor cells in relation to tumor bed)). (a) In Becker 1a no residual tumor cells may be detected. (b) In Becker 1b less than 10% residual tumor cells are found (red inset-frame on the right picture). Scale bar: 1000  $\mu\text{m}$ .

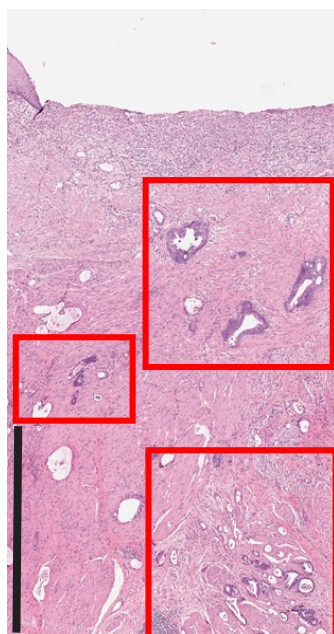

**Figure S2.** Histopathologic response grade Becker 2 (Partial response (10–50% residual tumor cells in relation to tumor bed)). Scattered viable tumor deposits are detectable throughout the tumor bed, which do not exceed 50% of the complete tumor area. Scale bar: 1000  $\mu$ m.

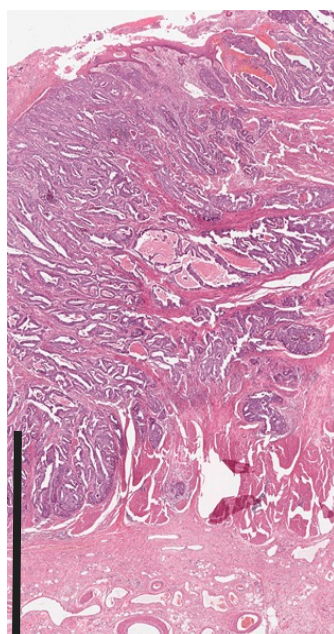

**Figure S3.** Histopathologic response grade Becker 3 (Non-response (>50% residual tumor cells in relation to tumor bed)). The tumor bed shows only some regression signs, most of the tumor consists of viable tumor cells. Scale bar: 1000  $\mu$ m.

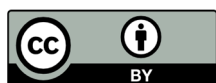

Supplement: s1 [file s1]
